1           **Dispersal ability of *Neophilaenus campestris*, a vector of *Xylella***  
2           ***fastidiosa*, from olive groves to over-summering hosts**

3           **Authors: Lago, C<sup>1,2\*</sup>, Morente, M<sup>3\*</sup>, De las Heras-Bravo D<sup>3</sup>, Marti**  
4           **Campoy, A<sup>4</sup>, Rodriguez-Ballester F<sup>4</sup>, Plaza, M<sup>1</sup>, Moreno<sup>1</sup>, A., A. Fereres<sup>1</sup>**

5           <sup>1</sup> Instituto de Ciencias Agrarias – Consejo Superior de Investigaciones Científicas (ICA-  
6           CSIC) Madrid, Spain. <sup>2</sup> Departamento de Producción Agraria, Escuela Técnica Superior  
7           de Ingeniería Agronómica, Alimentaria y de Biosistemas (ETSIAAB), Universidad  
8           Politécnica de Madrid (UPM) Madrid, Spain. <sup>3</sup> Instituto Madrileño de Investigación y  
9           Desarrollo Rural, Agrario y Alimentario (IMIDRA), Alcalá de Henares (Spain).<sup>4</sup>  
10          Instituto de Tecnologías de la Información y Comunicaciones (ITACA), Universitat  
11          Politécnica de València, Valencia, Spain.

12

13          \* These authors contributed equally to this work.

14

15

16

**Correspondance:**

17

Alberto Fereres

18

Departamento de Insectos Vectores de Patógenos de Plantas. Instituto de  
19          Ciencias Agrarias- Consejo superior de Investigaciones Científicas (ICA-  
20          CSIC). Serrano 115 b, Madrid, Madrid, España. CP: 28014.

21

Tel +34-917452500

22

Email: a.fereres@csic.es

23

24

Running Head: Dispersal of *Neophilaenus campestris*

25

26           **SUMMARY**

27           *Neophilaenus campestris* is one of the recently identified spittlebugs  
28           (Hemiptera: Cercopoidea) able to transmit *Xylella fastidiosa* to olive trees.  
29           Considering its vector ability and the wide distribution of this species in Spain,  
30           *N. campestris* should be considered a serious threat to key crops that are vital  
31           for Spanish agriculture such as olive, almonds and grapevines. Migration and  
32           dispersal abilities of insect vectors have profound implications in the spread of  
33           vector-borne diseases. Thus, knowledge on the dispersal ability of *N.*  
34           *campestris* is essential to model, predict and limit the spread of the diseases  
35           caused by *X. fastidiosa*. A mark-release-recapture technique was developed to  
36           track between-field movements of *N. campestris* during its late spring  
37           migration from the ground cover grasses within olive groves to sheltered areas  
38           dominated by pine trees. An indoor assay showed that the fluorescent dust  
39           used for marking did not affect the survival nor the flying ability of *N.*  
40           *campestris*. Spittlebug adults captured in olive groves at Los Santos de la  
41           Humosa (Madrid, Spain) during late spring, 2019 were dusted with four  
42           fluorescent colours and released in four different locations. Six recapture  
43           samplings were performed 23 to 42 days after release in 12 different sites  
44           located within a maximum distance of 2.8 km from the release point. Results  
45           indicated that *N. campestris* was able to disperse a maximum distance of 2473  
46           m in 35 days from the olive groves to areas dominated by pine trees.  
47           Furthermore, our flight mill studies also showed that *N. campestris* was able to  
48           fly long distances, reaching almost 1.4 km in an 82 minutes' single flight.

49           Moreover, we carried out a survey of directional movement of potential  
50           vectors of *X. fastidiosa* in an olive grove located in Villa del Prado (Madrid).

51 We used yellow sticky bands, a Malaise trap and a vertical yellow sticky net to  
52 assess the directional movement from olive groves to surrounding managed  
53 and unmanaged areas. The captures obtained in the yellow sticky bands  
54 showed that spittlebugs dispersal from the olive grove to surrounding  
55 vegetation matched with the time when the ground cover dried out. The  
56 highest number of spittlebugs was captured in the border between the olive  
57 grove and a vineyard close by.

58 Altogether, our findings suggest that eradication measures by rooting-up  
59 *X. fastidiosa*-infected and non-infected trees in a radius of 100 m are of limited  
60 value because vectors are able to disperse rapidly over distances much longer  
61 than expected.

62

63 **KEYWORDS:** Mass-release-recapture, migration, fluorescent dust, insect  
64 vector, *Pinus pinea*, *Pinus halepensis*.

65

66 **1. INTRODUCTION**

67 *Xylella fastidiosa* Wells (1987) is a vector-borne plant pathogenic  
68 bacterium native to the Americas, which has been recently detected in Europe  
69 (EFSA, 2019). The bacterium is responsible for severe diseases of several  
70 economically important crops such as olive, almond, grapevines and citrus  
71 (Hopkins, 1989; Saponari et al., 2013). In Europe, the bacterium was firstly  
72 detected in 2013 in Apulia, southern Italy, (Saponari et al., 2013) where it is  
73 responsible for the Olive Quick Decline Syndrome (OQDS), a disease that  
74 killed more than a million olive trees in this region (Martelli et al., 2016;  
75 Saponari et al., 2017; EPPO, 2018). After the detection of *X. fastidiosa* in Italy,  
76 the European Union developed a large-scale surveying plan focused on the  
77 detection of the bacterium in different economically important crops  
78 throughout Europe. As a result, the pathogen was detected in France, Germany,  
79 Portugal and Spain (EFSA, 2019). Very recently, *X. fastidiosa* was also  
80 detected in Northern Israel (EPPO, 2019). In Spain, *X. fastidiosa* was first  
81 detected in the Balearic Islands in 2016 on cherry, and months later on almond,  
82 wild and cultivated olive and grapevines among other crops. In 2017, the  
83 bacterium was also found in the Valle de Guadalest (Alicante), on almond trees  
84 (MAPA. GOB, 2019) and the disease has now spread to a wide area close to  
85 140,000 ha (Generalitat Valenciana, 2019). *X. fastidiosa* was also found on  
86 olives in Villarejo de Salvanés (Madrid, Spain) and *Polygala myrtifolia* in  
87 Almeria, Spain, although these infections were officially declared eradicated.

88 *X. fastidiosa* is transmitted to plants exclusively by xylem-sap feeding  
89 insects (Frazier 1965). Insects that are exclusively xylem-sap feeders, thus  
90 putative vectors of the fastidious bacterium, belong to the Order Hemiptera,



91 suborder Cicadomorpha, Superfamilies Cercopoidea (spittlebugs or  
92 froghoppers) and Cicadoidea (cicadas), as well as to the Family Cicadellidae,  
93 Subfamily Cicadellinae (sharpshooters) (Novotny & Wilson, 1997; Redak et  
94 al., 2004; Almeida et al., 2005; Krugner et al., 2019). While sharpshooters are  
95 overall scarce in Europe, spittlebugs are much more abundant, thus they are  
96 considered as the main potential vectors of *X. fastidiosa* in the European  
97 continent (Cornara et al., 2019; Jacques et al., 2019). The meadow spittlebug,  
98 *Philaenus spumarius* L. (1758) (Hemiptera: Aphrophoridae) was identified as  
99 the main vector of *X. fastidiosa* in the olive groves of southern Italy (Cornara  
100 et al., 2016; Cornara et al., 2017a). Moreover, the spittlebugs *Neophilaenus*  
101 *campestris* Fallen (1805) and *Philaenus italosignus* Drosopoulos & Remane  
102 (2000) have been found to transmit *X. fastidiosa* to olive and other plants under  
103 experimental conditions, although less efficiently than *P. spumarius* (Cavaliere  
104 et al. 2019). Recently, Cornara et al. (2020b) found that the main European  
105 cicada species, *Cicada orni*, is unable to transmit the ST53 strain of *X.*  
106 *fastidiosa* to olive plants.

107 Migratory journeys and dispersal abilities have profound implications in  
108 the spread of vector-borne diseases (Irwin & Thresh 1988; Chapman et al.,  
109 2015; Fereres et al., 2017). Adults of *P. spumarius* and related species are able  
110 to actively disperse, with a migratory behaviour been observed by several  
111 authors (Weaver, 1951; Weaver & King, 1954; Lavigne, 1959; Halkka et al.,  
112 1967; Halkka et al., 1971; Cornara et al., 2018; Bodino et al. 2019). *P.*  
113 *spumarius* and *N. campestris* adults spend most of their life cycle on the  
114 ground vegetation (Mazzoni, 2005; Dongiovanni, 2018; Morente et al., 2018a).  
115 The first migration seems to happen in summer (Weaver & King, 1954;

116 Waloff, 1973). It has been observed that they displace from the ground when  
117 the grasses dry out, to woody hosts and evergreen or deciduous plant species  
118 (Lopes et al., 2014; Cornara et al., 2016; Morente et al., 2018a; Antonatos et  
119 al., 2019). Later in the fall, spittlebugs leave their woody hosts to lay their eggs  
120 after the first rains on ground cover vegetation and plant debris present in olive  
121 groves (Cruaud et al., 2018; Morente et al., 2018a; Antonatos et al., 2019).  
122 Morente et al., (2018a) and Lopes et al., (2014) have reported that *N.*  
123 *campestris* are abundant in pine trees (*Pinus halepensis*) in the summer months  
124 in continental Spain. This suggests that pine trees could be an over-summering  
125 host plant exploited by *N. campestris* as a shelter when the grasses dry out.  
126 Despite spittlebugs spend most of the time on the ground vegetation, it has  
127 been proposed that they may play an important role in *X. fastidiosa*  
128 transmission when they displace from grasses in the late spring to feed on  
129 woody hosts (Almeida, 2016; Morente et al., 2018a). In the process of  
130 selecting their over-summering host they can settle and feed on woody crops  
131 such as almond and grapevine where they can transmit the disease (Purcell,  
132 1980). Indeed, since the process of transmission of *X. fastidiosa* may occur in  
133 few minutes (Cornara et al., 2020a), non-colonizing spittlebug species may  
134 have an impact on disease epidemiology. This could be the case of *N.*  
135 *campestris* that is frequently found in ground cover vegetation in olive groves  
136 but is rarely found feeding on the olive tree canopy (Morente et al., 2018a;  
137 Bodino et al., 2019).

138 Weaver and King (1954) observed that marked *P. spumarius* travelled  
139 more than 30 m in a single flight, and moved as much as 100 m within 24  
140 hours from the release point. The same authors also observed that *P. spumarius*

141 adults mainly fly at a height of 15 to 70 cm above the ground. In contrast,  
142 Freeman (1945) collected *P. spumarius* and *N. lineatus* at 84 m above ground  
143 and Reynolds et al. (2017) reported captures of *N. lineatus* at 200 m above  
144 ground suggesting that they can reach much higher altitudes. Migrating insects  
145 are strongly influenced by the planetary boundary layer, the lowest part of the  
146 troposphere, which is defined by turbulent convective air motions and stable  
147 laminar air currents (Caughey, 1984; Drake & Farrow, 1988; Isard et al.,  
148 1990). Near the ground, the speed of flying insects is higher than the wind  
149 speed, so insects are capable to intentionally displace to, a specific zone in the  
150 atmosphere defined as the flight boundary layer (Southwood, 1962; Taylor,  
151 1974; Isard et al., 1990). When insects travel above the flight boundary layer,  
152 they can reach a stable part of the planetary boundary layer, where the wind  
153 speed is maximum usually at few hundred meters in height. Thus, insects  
154 reaching the planetary boundary layer can be transported by these winds  
155 commonly known as low-level jet winds (Gerhardt, 1962; Drake & Farrow,  
156 1988). Several studies show that even the weakly flying insects can be  
157 transported long distances due to low-level jet winds (Pienkowski & Medler,  
158 1964; Drake, 1985; Wallin & Loonan, 1971; Sedlacek & Freytag, 1986; Zhu et  
159 al., 2006). Thus, all the captures in altitude of spittlebugs previously reported  
160 by several authors strongly suggest that *X. fastidiosa* vectors may perform long  
161 distance migrations.

162 Studying dispersal patterns and insect migration behaviour requires insect  
163 tracking in the field, which can be challenging due to their small size and  
164 general lack of specific return-migration sites (Chapman et al., 2015).  
165 Nevertheless, a combination of several methods can improve our knowledge

166 on the movement and dispersal behaviour of the vectors of *X. fastidiosa*  
167 (Purcell et al., 1994). Mark-release-recapture studies using multiple types of  
168 markers have been used since 1920s to understand the movement of insects in  
169 the field (Hagler & Jackson, 2001; Hagler, 2019). Fluorescent dusts are one of  
170 the most extended markers used for mark-release-recapture tests (Byrne et al.,  
171 1996; Prasifka et al., 1999; Hagler & Jackson, 2001; Miranda et al., 2018).  
172 This technique has been largely used to study the movement of important  
173 agricultural insect pests, including the leafhopper *Scaphoideus titanus* Ball,  
174 which is the vector of the Flavescence dorée plant disease, or American vectors  
175 of *X. fastidiosa* such as *Homalodisca vitripennis* (Germar 1821) (Coviella et  
176 al., 2006; Northfield et al., in 2009; Lessio et al., 2014). Additionally, other  
177 techniques based on the interception of the insect' displacement provide  
178 information about the movement of flying insects across habitat boundaries  
179 (Stewart, 2002).

180 Alternatively, laboratory-based flight mills have been used since the  
181 1950s to generate knowledge on the flight behaviour of several order of  
182 insects: Orthoptera (Krogh & Weis-Fogh, 1952), Lepidoptera (Guo, 2020),  
183 Coleoptera (Ávalos, 2014; Yu et al., 2019), Hemiptera (Taylor, 1992; Riley et  
184 al., 1997, Martini et al., 2015) or Diptera (Somerville, 2019). Despite the broad  
185 variety of flight mill designs, they are all based on the same principle: an insect  
186 is attached to an arm, which is connected to a stand, then the insect flies  
187 describing a circular trajectory, allowing continuous measurement of flight  
188 parameters (Minter, 2018). This tool has been applied to study the dispersal  
189 ability of serious insect pests, such as the red palm weevil (Avalos et al., 2014)  
190 or the western corn rootworm (Yu et al., 2019). An interesting application of

191 flight mills is to describe how a plant pathogen may modify the flying ability  
192 of its vector such as the Asian citrus psyllid when infected with *Candidatus*  
193 *liberibacter asiaticus* (Martini et al., 2015). Moreover, flight mills are  
194 commonly used to describe how abiotic factors (humidity, temperature) or  
195 biotic factors (age, sex, mated status) influence insect displacement (Riley et  
196 al., 1997; Zhang et al., 2008; Cheng et al., 2012; Jones et al., 2015). The vast  
197 literature of studies using flight mills probe that this tool, contribute to  
198 understand the flight behaviour of important insect pests.

199 One of the *X. fastidiosa* eradication measures that are mandatory by the  
200 European Commission (EU 2015/789, Article 6) consists in up-rooting the  
201 infected plants and the entire host plants in a radius of 100 m, regardless their  
202 health status. This strategy is mainly based on the Weaver & King study  
203 (1954), which describes that *P. spumarius* can travel as much as 100 m in 24  
204 hours. However, to date there is no precise information on how far spittlebugs  
205 can fly when they migrate from cultivated fields to their over-summering  
206 hosts.

207 Therefore, the main aim of this work was to understand spittlebug  
208 dispersal dynamics by combining different techniques: (1) flight mill assays  
209 (2) capture-mark-release-recapture assay and (3) directional movement study  
210 using interception traps.

211

212

213

214

215

## 216            **2. MATERIAL AND METHODS**

217            An indoor study to assess the persistence of fluorescent dusts (Day-Glo  
218            Color Corp. Cleveland, OH, USA) and its effect on the survivorship and flight  
219            ability of *N. campestris* was conducted before the mark-release-recapture  
220            assay. This type of fluorescent dusts has been used for many years to mark  
221            insects and study their dispersal ability in the field (Stern et al., 1965). *N.*  
222            *campestris* adults were collected by sweep net in Los Santos de la Humosa  
223            (Madrid, Spain) in late spring 2019; the location was the same where the mark-  
224            release-recapture assay was performed. Spittlebugs collected were identified  
225            according to Ribaut (1952), Ossiannillsson (1981), Della Giustina (1989),  
226            Holzinger et al. (2003) and Mozaffarian & Wilson (2016). Insects collected  
227            were caged on *Bromus madritensis* during 3 days for acclimation in the  
228            greenhouse facilities at ICA-CSIC, Madrid, Spain.

### 229            **2.1. Persistence of fluorescent dusts and their effect on the survival of** 230            ***Neophilaenus campestris***

231            To assess the effect of the fluorescent dusts on the survival of *N.*  
232            *campestris*, 200 individuals were randomly split in 5 groups: a dusted group  
233            which included one of each of the following colours: pink, blue, yellow and  
234            orange and an undusted control group. We used 2.8 mg of fluorescent dust per  
235            40 insects for each of the dusted groups. The dust was first introduced in the  
236            falcon tube and then 40 adult insects/tube were released. Then, the falcon tube  
237            was gently shaken to allow the dust to cover most of the insect's body. Then,  
238            each group of insects was released in a cage (40 adults per cage) containing 4-  
239            week old potted *B. madritensis* plants (plants grown in a climatic chamber at  
240            24:18°C of temperature and photoperiod 14:10). The number of alive and dead

241 insects on each cage and the persistence of the dust on the insect's body were  
242 recorded twice a week during 35 days. A 4-level scale of dust coverage was  
243 established, in relation to the intensity of the fluorescence on the insects. 1)  
244 completely dusted, 2) less dust but visible at naked eye, 3) fluorescence not  
245 visible at naked eye but visible by using UV light, 4) undusted. The assay was  
246 conducted in a greenhouse at ICA-CSIC (Madrid) (Temperature (mean  $\pm$  SE):  
247  $22.28 \pm 0.23^\circ\text{C}$ ; Max  $40.06^\circ\text{C}$ ; Min  $7.99^\circ\text{C}$ . RH (mean  $\pm$  SE):  $54.64 \pm 0.61\%$ ;  
248 Max:  $99.31\%$ ; Min  $19.95\%$ ). The plants were replaced every week to keep  
249 optimal conditions for insect rearing. We performed a two-sample Cox  
250 proportional hazards model to determine whether the colour of the fluorescent  
251 dust affected the survival of adults (R Core Team, 2019).

## 252 **2.2. Effect of fluorescent dusts on the flight behaviour of *Neophilaenus*** 253 ***campestris***

254 A commercial flight mill device (Insect FlyteMill, Crist Instruments,  
255 Hagerstown, MD, USA) with some adaptations to reduce friction and facilitate  
256 the flight of small insects was used to evaluate the effect of the dust on the  
257 flight potential of *N. campestris*. Flight mill recordings were taken 1-3 days  
258 after the insects were dusted with fluorescent dust using the same methodology  
259 for marking and the same 5 experimental groups (4 dusted and one undusted)  
260 described above. Individuals were exposed to greenhouse conditions (T (Mean  
261  $\pm$  SE):  $22.28 \pm 0.23^\circ\text{C}$ ; Max  $40.06^\circ\text{C}$ ; Min  $7.99^\circ\text{C}$ . RH (Mean  $\pm$  SE):  $54.64 \pm$   
262  $0.61\%$ ; Max:  $99.31\%$ ; Min  $19.95\%$ ) until the experiments were started.  
263 Experiments were carried out in the laboratory under controlled conditions:  
264 temperature ( $24 \pm 1^\circ\text{C}$ ), artificial fluorescent light ( $10 \mu\text{E m}^{-2} \text{s}^{-1}$ ) and  
265 humidity (25-55%). The experiments took place from 9 AM to 18 PM. Insects

266 were first anesthetized by applying CO<sub>2</sub> during 5 seconds. Then, they were  
267 glued to a pinhead by the pronotum using a small drop of adhesive (Hot melt  
268 glue, NV98591 Nivel, Leganes, Madrid, Spain). Then, the insects were placed  
269 on one side of the flight mill's arm (29.6 cm) with a suitable counter balance on  
270 the opposite side of the arm to make them fly in a circular trajectory. Insects  
271 that did not start to fly after 15 minutes were removed and discarded. The  
272 flight activity was recorded until the insect stopped flying for a time interval  
273 longer than 15 minutes.

274 The data collected by the flight mill device were the following: the  
275 distance flown (m), the total flight duration (s) and the flight speed (m/s). A  
276 specific “mill\_recorder” computer-based software and hardware device  
277 recorded the data and the “mill\_processor” software calculated the flight  
278 descriptors (both developed by Marti-Campoy & Rodriguez-Ballester at the  
279 ITACA-Universitat Politècnica de València, Valencia, Spain). The flight  
280 potential was evaluated according to the following flight descriptors: (1) Flight  
281 incidence: the ability of a given insect to perform a flight (Yes/No); (2)  
282 Number of flights: a new flight in the recording was assumed when an insect  
283 spent more than 20 seconds to complete one turn and until a 15 minutes' lag;  
284 (3) Total distance travelled: sum of the distance covered by all flights; (4)  
285 Total duration: sum of the duration of all flights; (5) Average speed: mean of  
286 the speed of each individual flight. The maximum distance travelled, flight  
287 duration and average speed were also recorded. A total of 89 individuals were  
288 tested until completion of 10 flight recordings for each of the 5 experimental  
289 treatments -dusted and undusted- (50 recordings in total).



290 We compared the effect of the dust in the flight behaviour of the 5  
291 different experimental groups for each of the flight descriptors (dependent  
292 variables) by an ANOVA or a Kruskal-Wallis test depending on the  
293 distribution of the data (Gaussian or non-Gaussian distribution, respectively).  
294 The probability of performing or not a flight was tested using a Chi-squared  
295 test. Data of non-flyers was not considered for the analysis. Statistical analysis  
296 was performed using the SPSS software (IBM SPSS Statistics 25).

### 297 **2.3. Mass-Mark-Recapture assay (MMR)**

298 The study was conducted at Los Santos de la Humosa, Eastern Madrid  
299 (Spain) (40° 30' 04.08'' N 3° 15.25' 58'' W, 850 m). We used 4 different  
300 colours (pink, blue, yellow and orange) for marking insects that were released  
301 in 4 different olive groves separated 200 m from each other (one colour per  
302 grove). The different colours were used to identify the distance travelled from  
303 each of the 4 release points to the recapture sites. The insect releases were  
304 carried out in olive groves with abundant ground cover vegetation, mainly  
305 dominated by grasses (Poaceae) (Figure 1, Annex 1). The selection of the  
306 recapture sites was based on the presence of perennial natural woody  
307 vegetation, which included known host species of *N. campestris* and other  
308 spittlebug species present in the area such as the vector of *X. fastidiosa* *P.*  
309 *spumarius* and the potential vector *Lepyronia coleoptrata* (Lopes et al., 2014;  
310 Morente et al., 2018a). Thus, recapture sampling procedure was performed in  
311 12 different sites where the dominant vegetation was *Pinus halepensis*, *P.*  
312 *pinea*, *Quercus coccifera*, *Q. faginea*, *Retama sphaerocarpa*, *Foeniculum*  
313 *vulgare*, *Eryngium campestre* and *Prunus dulcis* (Figure 1). Recapture points  
314 were located at different distances, being the minimum distance 94 m and the

315 maximum of 2754 m from the most distant release point (Figure 1). The first  
316 spittlebug capture-mark-release procedure was carried out on 23rd May 2019  
317 following a methodology similar to the one described by Nakata (2008). Adult  
318 individuals were captured by a sweep net from the ground cover vegetation in  
319 the four olive groves mentioned above and stored in 50 ml conical falcon  
320 tubes. Individuals captured were dusted in groups of 100 insects per falcon  
321 tube. Thus, the insects were introduced in a falcon tube that contained 7 mg of  
322 fluorescent dust (Day-Glo Color Corp., Cleveland, OH, USA). The same  
323 procedure was repeated with each of the 4 different colours. The dusted  
324 spittlebugs were released on the green ground cover of each olive grove. The  
325 first recapture event was carried out on 12th June 2019, 20 days after the  
326 release date and matching with the senescence of the ground cover vegetation.  
327 In total we performed the following five recaptures: 12th, 18th, 19th, 20th,  
328 27th June and 5th July. Because the fluorescent dust was not visible at naked  
329 eye, insects were recaptured by sweep net and caged on *B. madritensis* plants  
330 and transferred to the laboratory. We assessed the presence of fluorescent dust  
331 on the body of every individual by using a UV lamp 13W (Halotec F6T5/BLB,  
332 Koala Components, Torrent (Valencia), Spain).

333 Regarding the high adherence of the fluorescence dust we carried out several  
334 precautionary measures in order to avoid the contamination of the individuals  
335 recaptured. First, we replaced every day all materials used in the marking  
336 process (i.e. plastic bags and Falcon tubes). Moreover, we replaced the Falcon  
337 tubes every day of recapture and the insect mouth aspirators were inspected  
338 every day checked under UV light looking for fluorescence traces.  
339 Furthermore, the individuals recaptured at the field were stored in groups of 50

340 individuals in falcon tubes and, later, caged on *B. madritensis* plants (one cage  
341 per location of recapture and date), for transportation to the laboratory. Then,  
342 all the recaptured individuals were checked under UV light and screened for  
343 the presence of fluorescent dust in the insect's body. We considered a marked  
344 spittlebug those that showed clear trace of fluorescent dust (Figure 2).

#### 345 **2.4. Directional movement of spittlebugs in an olive grove**

346 The survey was carried out in 2019 from mid-May to late June, in a low-  
347 input olive grove located in “Villa del Prado” in the southwest of Madrid,  
348 Spain. The grove contained abundant ground cover vegetation until it naturally  
349 dried out in the summer. The percentage of fresh ground vegetation was 70%  
350 at the first sampling date in May 24<sup>th</sup> and completely dried out in early June. A  
351 vineyard and three managed conventional tillage olive groves surrounded the  
352 field of study. On one of the borders between the field of study and the  
353 surrounding olive groves there were a few number of *Quercus ilex* subsp.  
354 *ballota* trees (Figure 3).

355 Adults of putative vectors of *X. fastidiosa* (Hemiptera: Cercopoidea) were  
356 sampled by using 4 vertical yellow sticky traps, 1 directional Malaise trap and  
357 1 vertical yellow sticky net.

358 The 4 vertical yellow sticky traps (Econex 100 m X 30 cm TA123,  
359 Murcia, Spain) were composed of two sticky bands with plastic surfaces  
360 (Figure 4). The bands were held with two steel sticks placed 170 cm apart from  
361 each other. The two bands were placed at two different heights: one at 20 cm  
362 and the other at 130 cm above the ground (Figure 4).

363 The Malaise trap (BT1003, MegaView Science Co., Ltd., Taichung,  
364 Taiwan) used has two collecting heads with bottles filled with glycerol (50%)

365 for directional sampling. Each bottle contained insects intercepted by each side  
366 of the vertical net. Therefore, catches represent insects emigrating or  
367 immigrating out or into the field of study.

368 The vertical yellow net (size: 2x3m; mesh: 7x7 threads/cm) was sprayed  
369 with glue (Souverode aerosol, Plantin SARL, Courthézon, France) to facilitate  
370 catches.

371 The four yellow sticky traps were placed between the field of study and  
372 the surrounding fields, one in each of the borders of the olive grove (Figure 3:  
373 A, B, C, D), facing each of the two sides of the olive grove, allowing  
374 directional sampling to differentiate between immigration and emigration out  
375 and into the field. The 4 yellow sticky traps were checked and replaced once a  
376 week. The Malaise trap and the vertical net trap were placed between the  
377 vineyard and the olive grove of study once a week (Figure 3: B). We checked  
378 the latter traps every half an hour from 9AM to 2PM and then they were  
379 removed. All the spittlebugs captured were counted and identified in the field.  
380 We kept track of insect directional movement by counting insects trapped on  
381 both sides of each type of trap (those emigrating and immigrating out or into  
382 the field of study).

383

### 384 **3. RESULTS**

#### 385 **.3.1 Persistence of fluorescent dusts and their effects on survival and flight** 386 **activity of *Neophilaenus campestris***

##### 387 *3.1.1. Persistence of dusts and effects on *N. campestris* survival*

388 Dusted and undusted *N. campestris* maintained under greenhouse conditions  
389 did not present significant differences in survival (two-sample Cox

390 proportional hazards model  $Z= 1.271$ ,  $P= 0.204$ ) (Figure 5). Moreover, none of  
391 the marked individuals manifested a loss of marking dust beyond the level 2  
392 during the 35 days' period of the experiment being all the marked insects  
393 easily distinguishable under a naked eye. It is worth noting that the indoor  
394 environmental conditions where the insects were raised were different from  
395 those in the field. Insects were maintained inside cages in a glasshouse with no  
396 exposure to wind, rain or strong UV radiation.

### 397 *3.1.2. Dust effect on the flight activity of *N. campestris**

398 Flight mill assays showed that the overall proportion of individuals of *N.*  
399 *campestris* that were able to fly was 56.2% (50/89). There were no significant  
400 differences ( $df= 4$ ;  $\text{Chi-}^2 = 1.913$ ;  $P= 0.752$ ) between dusted and undusted  
401 insects in the proportion of individuals able to fly. Furthermore, no significant  
402 differences were found between dusted and undusted individuals for any of the  
403 flight descriptors measured: number of flights, total distance travelled, total  
404 duration of flight and average speed of flight (Table 1), according to ANOVA  
405 or Kruskal-Wallis tests. Therefore, all the data of dusted and undusted  
406 individuals was pulled together and the flight descriptors were calculated for  
407 all insects ( $n=50$ ) (Table 2). *N. campestris* travelled 282 m in about 17 min in  
408 average in a single flight, and one individual was able to travel almost 1.4 km  
409 in an 82 minutes' single flight. The mean speed of flight was 0.26 m/s.

### 410 **3.2. Mass-Mark-Recapture assay (MMR)**

411 During the MRR assay (23<sup>rd</sup> May – 5<sup>th</sup> July ) the temperatures averaged  
412  $23.4 \pm 0.78^\circ\text{C}$  and the wind speed varied over the course of the day with a  
413 mean of  $2.5 \pm 0.14$  m/s showing rates of maximum wind speed of 4.2 m/s and  
414 minimum of 1.8 m/s. A total of 1315 individuals of *N. campestris*, 430

415 individuals of *Lepyronia coleoptrata* and 30 individuals of *P.spumarius* were  
416 released. All the marked individuals that were recaptured were *N. campestris*  
417 and we were unable to recover any marked *P. spumarius* or *L. coleoptrata* in  
418 the sampling sites. Therefore, the results refer exclusively to *N. campestris*  
419 (Table 3). From a total of 1315 marked and released *N. campestris* (from the  
420 four dusted groups), 21 marked individuals were recaptured representing a  
421 mark-recapture rate of 1.6% (Table 3). A total of 791 individuals of *N.*  
422 *campestris* (considering both marked individuals and “wild” not marked  
423 insects) were captured from the 12 recapture sampling sites. However,  
424 recaptures of marked individuals occurred only in three (D, G and K) of the 12  
425 sites sampled (Figure 1). The marked individuals that were recaptured were  
426 found only on two different species of pine trees: *P. halepensis* and *P. pinea*.

427 All the individuals recaptured were dusted with either orange or yellow  
428 dusts. No individuals with a blue or pink dust were recaptured.

429 *N. campestris* recaptured in points D (8 individuals) and G (8 individuals)  
430 were marked with the orange colour (Figure 2) which indicated that these  
431 insects flew 123 m from the orange release point to the D zone and 281 m to  
432 the G zone. Furthermore, 5 dusted individuals of *N. campestris* were  
433 recaptured in the K point, which was about 2000 meters away from the release  
434 point. Four of these 5 individuals presented orange dust while 1 individual was  
435 marked only with yellow fluorescent dust.

436 The majority of the orange dusted insects presented many orange dots and  
437 few yellow or whitish dust particles on their body (Figure. 2) but for the  
438 purpose of the analysis we considered all marked individuals in zones D and G  
439 coming from the orange release site (Table 2).

440 In point D, recaptures were possible throughout the whole assay. Thus, 3  
441 orange-marked *N. campestris* were recaptured on 12<sup>th</sup> June, 3 on 19<sup>th</sup> June and  
442 2 individuals on 27<sup>th</sup> June. By contrast, in point G the only date of recapture  
443 was 5<sup>th</sup> July when the 8 orange-marked *N. campestris* were recaptured. Finally,  
444 in the point K, the 4 orange-marked and the full yellow-marked *N. campestris*  
445 were captured on 27<sup>th</sup> June. Recaptures in point D were done under variable  
446 climatic conditions while in point G and point K, recaptures matched with the  
447 two of the most windy and hottest days of the recapturing period : 27.94 °C of  
448 temperature and 2.9 m/s of wind speed and 30.96°C and 4.15 m/s respectively.

### 449 **3.3. Directional movement of spittlebugs in an olive grove**

450 Most putative vectors of *X. fastidiosa* collected in our survey were caught  
451 in the yellow sticky bands. Thus, we collected the greatest number of vectors  
452 in band b (Figure 3), situated between the vineyard and the olive grove of  
453 study. Results indicated a greater number of immigrating insects coming from  
454 the vineyard to the olive grove: 26 in total, 10 *N. campestris*; nine *P.*  
455 *spumarius*; three *L. coleoptrata*; four *Cercopis spp.* The number of potential  
456 vectors emigrating from the olive grove to the vineyard was lower: 16 in total,  
457 eight *N. campestris*; three *P. spumarius*; one *L. coleoptrata*; four *Cercopis spp.*  
458 Most individuals were captured before second week of June (Figure 6), when  
459 the ground vegetation dried out. The band a (Figure 3), collected three  
460 immigrating spittlebugs (one *N. campestris* and two *P. spumarius*), while five  
461 emigrating spittlebugs (two *N. campestris*; three *P. spumarius*). The band c  
462 (Figure 3) collected one immigrating spittlebug (one *N. campestris*) and two  
463 emigrating spittlebugs, (one *N. campestris* one *P. spumarius*). Finally, in band  
464 d (Figure 3) one single *L. coleoptrata* and one *N. campestris* were captured

465 immigrating and emigrating from the field of study, respectively. Regarding  
466 the Malaise and vertical net traps, there were almost no captures. A single  
467 *Lepyronia sp.* was captured with the vertical net and no potential vectors of *X.*  
468 *fastidiosa* were caught in the Malaise trap.

469

#### 470 **4. DISCUSSION**

471 *N. campestris* is a vector of *X. fastidiosa* (Cavaliere et al., 2019) and has a  
472 widespread distribution across the Iberian Peninsula (Morente et al., 2018a). *N.*  
473 *campestris* spends most of its life cycle on the ground cover vegetation, mainly  
474 on grasses where mating, oviposition and feeding occur. However, this species  
475 moves from the ground cover to trees and shrubs in the late spring (Lopes et al  
476 2014; Cornara et al., 2016; Morente et al., 2018a; Antonatos et al., 2019). To  
477 date, politics of containment, common to the European Union, relies on scarce  
478 information about the Cercopoidea dispersal abilities, most of them collected  
479 in landscapes different from the Mediterranean scrubland (Weaver & King,  
480 1954; Halkka et al., 1971; Plazio et al., 2017). However, landscape  
481 composition and climate conditions can influence the distribution and  
482 movement of insects affecting the speed and the track of movement (Crist et  
483 al., 1992; Jonsen & Taylor, 2000, Haynes & Cronin, 2003, 2006; Blackmer et  
484 al., 2006). Thus, information about the movement ability of *N. campestris* or  
485 any other vector species in the landscape of interest (an olive grove and the  
486 natural Mediterranean landscape surrounding in the present study) can be  
487 crucial to adopt effective solutions to contain the spread of *X. fastidiosa* in  
488 Europe.

489



490 Our indoor tests on survival, dust retention and flying capabilities of *N.*  
491 *campestris* showed that the methodology applied in our MRR field assay did  
492 not disturb the flight behavior or survival of the dusted spittlebugs. However,  
493 insects exposed to natural conditions were different to those exposed to indoor  
494 facilities as they are protected from rain and intensive UV light. This could  
495 explain why the marked insects collected in the field were not visible under  
496 naked eye and a UV lamp was always needed for detection of the fluorescent  
497 dust.

498 The flight mill study also showed that the flight potential of *N.*  
499 *campestris* was much higher than was previously assumed. Flight mill data can  
500 be difficult to interpret because insect's behavior and flying ability could be  
501 influenced because of manipulation. However, flight mill experiments allow  
502 comparing differences in flight behaviour between different groups, such as  
503 different insect species, ages, sexes or mated status (Dingle, 1966; Avalos et  
504 al., 2014; Minter et al., 2018; Guo et al., 2020). In the flight mill assay we  
505 found that dust marking did not affect the flight potential of *N. campestris*.  
506 Moreover, this assay estimates the flight potential of these insects, showing  
507 that they are able to travel much more than 100 m in less than an hour.

508 The results obtained in the MMR assay support previous studies (Lopes et  
509 al., 2014 and Morente et al., 2018a), which proved that *N. campestris* move  
510 and settle on pine trees during late spring and summer (in our study *P. pinea*  
511 and *P. halepensis*). Therefore, the spittlebugs that were recaptured in the K  
512 zone were able to travel distances longer than 2 km. Those that came from the  
513 orange release point travelled around 2282 m and those that came from the  
514 yellow release point moved a total of 2473 m, the longest distance covered by

515 a spittlebug recorded in a field assay until now (Freeman, 1945; Weaver &  
516 King, 1954; Reynolds et al., 2017). Thus, our results suggest that *N.*  
517 *campestris* is able to travel more than 2000 meters in 35 days. As other  
518 spittlebugs, the long-distance movement of *N. campestris* could be dependent  
519 on the winds. Thus, *P. spumarius* or *N. lineatus* might be capable to fly some  
520 meters up reaching the air currents to migrate passively (Freeman, 1945;  
521 Weaver & King, 1954; Reynolds et al., 2017). Regarding short-distance  
522 migration, we can assert that *N. campestris* is able to move more than 100 m in  
523 24 hours. The changing wind conditions during the assay did not enable us to  
524 identify a dominant wind pattern. Therefore, other variables such as the  
525 presence of resting places in the migration track, that serve as corridor to  
526 sheltered places, may favor the migration of *N. campestris* (Hunter, 2002).  
527 Moreover, most orange dusted insects presented some yellow spots on their  
528 body. However, except in the K point, where we found a yellow spittlebug, we  
529 did not find any other yellow dusted *N. campestris* in other zones. Mixed  
530 patches of olive groves and pine and oak woods surrounded the yellow and  
531 orange release points. Yellow and orange dusted *N. campestris* could have met  
532 in a middle resting point within the migration track where they could mate and  
533 thus transferred the dust from one individual to another. More likely, yellow  
534 dusted insects may have transferred some dust particles to the orange-marked  
535 insects while they remained in the cage in the laboratory before sorting them  
536 out in the microscope. When the recaptured insects were placed in the falcon  
537 tubes and cages they were able to contact each other and mate. Therefore,  
538 transfer of dust from one insect to another is a possibility that cannot be  
539 excluded. Finally, no *N. campestris* was found on the rest of overwintering

540 host plants sampled in the study such as oak trees. This result may indicate  
541 that, despite the polyphagous character of the insect, it presents a strong  
542 migratory preference for pines in the summer. Morente et al., 2018a described  
543 that *N. campestris* tend to return back to olive groves in the fall to lay the eggs.  
544 Thus, the presence of pines in the landscape surrounding the crop may favor  
545 the establishment and proliferation of *N. campestris* in a given area throughout  
546 the year. Thus, nymphs grow up on the ground cover -mainly grasses- in olive  
547 groves and the emerged adults spend most of the summer on the surrounding  
548 pine trees returning to the olive grove after the first rains in the fall to mate and  
549 lay their eggs on the emerging grasses. This has been observed in several areas  
550 of Spain including the Alicante region where *N. campestris* was very abundant  
551 in the grasses during the fall (Morente et al., 2018b)

552 In the survey of directional movement on potential vectors of *X.*  
553 *fastidiosa*, most of the spittlebugs were captured in the yellow sticky band  
554 placed between the olive grove and the vineyard. In contrast, there were fewer  
555 captures in the other three yellow sticky bands, placed between the olive grove  
556 of study and the other three olive groves. Moreover, few spittlebugs were  
557 captured after the ground vegetation dried out (Figure 6). This can be  
558 explained because of the lack of weeds in the surrounding olive groves that  
559 contrast with the succulence of the grapevine leaves and the presence of  
560 herbaceous vegetation cover in our field of study. A seasonal pattern in  
561 spittlebugs movement depending on the ground vegetation cover has been  
562 previously observed by several authors (Weaver & King, 1954; Waloff, 1973;  
563 Nilakhe & Buainain, 1988; Cornara et al., 2017a; Cruaud et al., 2018; Cornara  
564 et al., 2018; Bodino et al. 2019). This suggests that these insects movement

565 depends on the succulence of the plants available, so the non-tillage practices,  
566 and the presence of succulent plants in an area, could enhance the *X. fastidiosa*  
567 spread between agroecosystems. Also, the lack of catches in the Malaise trap  
568 and the vertical net in contrast to the yellow sticky bands, suggest that they are  
569 not a suitable sampling method for studying directional movement of  
570 spittlebugs. Other methods that allow a higher number of catches should be  
571 developed to study movement and migration of spittlebugs.

572 The short and long-distance migration capacity of *N. campestris* is added  
573 to a long list of difficulties that hamper the implementation of effective  
574 measurements of disease containment. Thus, our results showing that *N.*  
575 *campestris* can migrate and fly more than 2 km in 5 weeks together with the  
576 polyphagous habit of this species and its long life cycle invite to reconsider the  
577 methods applied until now in the infected crops. In fact, a recent modelling  
578 study by Strona et al (2020) shows that even limited probabilities of long  
579 distance dispersal of infectious vectors dramatically affected disease outbreaks  
580 caused by *X. fastidiosa* in olive groves in Andalusia (southern Spain). They  
581 concluded that identifying (and disrupting) long distance dispersal processes  
582 may be much more effective to contain disease epidemics than surveillance  
583 and intervention concentrated on local scale transmission processes. Thus, the  
584 eradication measures that are being adopted as a general rule in the EU to fight  
585 against the disease by up-rooting the infected plants and the entire host plants  
586 in a radius of 100 m, regardless their health status might not be the best  
587 strategy to contain the spread of diseases caused by *X. fastidiosa*. The fact that  
588 vectors of *X. fastidiosa* are able to fly much more than 100 m, the persistence  
589 of the disease in the vector for their entire life (almost 1 year) together with the

590 polyphagous nature of most xylem-feeders suggests that up-rooting uninfected  
591 trees in infected areas- may have a limited impact in containing the disease.

592 *X. fastidiosa* symptoms onset is variable depending on the plant species,  
593 from three to four months (as in grapevine) to years (in the case of the olive  
594 tree) (Almeida 2016). Moreover, the detection of the pathogen within the plant  
595 is a difficult task, which requires certain concentrations of the bacterium and  
596 the right collection of samples (at least 4 leaves per sample from different trees  
597 in a large scale sampling in the case of olive tree) (Loconsole et al., 2014).  
598 Additionally, vectors may acquire *X. fastidiosa* from infected asymptomatic  
599 hosts. Another important finding is that transmission of *X. fastidiosa* by their  
600 vectors is a very fast process (inoculation occurs in 2 to 7 minutes after the  
601 onset of the first probe) (Cornara et al., 2020a). Therefore, despite the fact that  
602 *N. campestris* adults do not colonize olive trees (Mazzoni, 2005; Cornara et al.  
603 2017a; Morente et al., 2018a; Bodino et al., 2019) they could easily land and  
604 probe briefly on olive canopies in late spring and summer when they disperse  
605 towards their over-summering hosts. In this process they could rapidly transmit  
606 *X. fastidiosa* from one tree to another. Thus, as suggested by Almeida (2016)  
607 eliminating the trees in a delimited infected area may have a limited impact in  
608 the disease containment. In summary, the main strategy to contain and limit *X.*  
609 *fastidiosa* outbreaks should be focused in managing vector populations in their  
610 early stage of development (immature stages). This will avoid or reduce the  
611 presence of adults in areas where the disease is present and limit the risk of long  
612 distance dispersal. This goal should be addressed in the most sustainable way  
613 by understanding the ecology, biology and behaviour of spittlebugs. Cultural

614 control tactics such as conservation tillage in the right moment will be essential  
615 to disrupt the life cycle of spittlebugs.

616 Finally, our study concentrated on *N. campestris*, which was the most  
617 abundant vector species in our area of study. However, the main vector of *X.*  
618 *fastidiosa* in Europe is *P. spumarius* (Cornara et al., 2019), thus additional  
619 studies are needed to determine the migration behaviour of *P. spumarius* in  
620 areas where this vector is the dominant species.

621

## 622 **5. ACKNOWLEDGMENTS**

623 Authors would like to acknowledge our colleagues Marcos Ramirez, Joao  
624 Leitao and Pierpaolo Natilla for their help in the field work. The work has been  
625 funded by the Ministerio de Ciencia e Innovación under the grant agreement  
626 no. AGL2017-89604-R and by Comunidad de Madrid under the grant  
627 agreement FP19-XYLELLA: Evaluación de la incidencia de *Xylella fastidiosa*  
628 en la Comunidad de Madrid.

629

## 630 **7. REFERENCES**

631

- 632 1. Almeida, R. P. (2016). Can Apulia's olive trees be saved?. *Science*, 353(6297),  
633 346-348.
- 634 2. Almeida, R. P., Blua, M. J., Lopes, J. R., & Purcell, A. H. (2005). Vector  
635 transmission of *Xylella fastidiosa*: applying fundamental knowledge to generate  
636 disease management strategies. *Annals of the Entomological Society of*  
637 *America*, 98(6), 775-786.
- 638 3. Antonatos, S., Papachristos, D. P., Kapantaidaki, D. E., Lytra, I. C., Varikou,  
639 K., Evangelou, V. I., & Milonas, P. (2019). Presence of Cicadomorpha in olive

- 640 orchards of Greece with special reference to *Xylella fastidiosa* vectors. *Journal*  
641 *of Applied Entomology*, 144,1–11.
- 642 4. Ávalos, J. A., Martí-Campoy, A., & Soto, A. (2014). Study of the flying ability  
643 of *Rhynchophorus ferrugineus* (Coleoptera: Dryophthoridae) adults using a  
644 computer-monitored flight mill. *Bulletin of entomological research*, 104(4),  
645 462-470.
- 646 5. Blackmer, J. L., Hagler, J. R., Simmons, G. S., & Henneberry, T. J. (2006).  
647 Dispersal of *Homalodisca vitripennis* (Homoptera: Cicadellidae) from a point  
648 release site in citrus. *Environmental entomology*, 35(6), 1617-1625.
- 649 6. Bodino, N., Cavalieri, V., Dongiovanni, C., Plazio, E., Saladini, M. A., Volani,  
650 S., Simonetto A., Fumarola G., Carolo M., Porcelli F., Gilioli G., & Domenico  
651 Bosco (2019). Phenology, seasonal abundance and stage-structure of spittlebug  
652 (Hemiptera: Aphrophoridae) populations in olive groves in Italy. *Scientific*  
653 *reports*, 9(1), 1-17.
- 654 7. Byrne, D. N., Rathman, R. J., Orum, T. V., & Palumbo, J. C. (1996). Localized  
655 migration and dispersal by the sweet potato whitefly, *Bemisia*  
656 *tabaci*. *Oecologia*, 105(3), 320-328.
- 657 8. Caughey, S. J. (1984). Observed characteristics of the atmospheric boundary  
658 layer. In *Atmospheric turbulence and air pollution modeling*. Springer,  
659 *Dordrecht* (pp. 107-158).
- 660 9. Cavalieri, V.; Altamura, G.; Fumarola, G.; di Carolo, M.; Saponari, M.;  
661 Cornara, D.; Bosco, D.; Dongiovanni, C. (2019) Transmission of *Xylella*  
662 *fastidiosa* Subspecies *Pauca* Sequence Type 53 by Different Insect Species.  
663 *Insects*, 10, 324.

- 664 10. Chapman, J. W., Reynolds, D. R., & Wilson, K. (2015). Long range seasonal  
665 migration in insects: mechanisms, evolutionary drivers and ecological  
666 consequences. *Ecology letters*, 18(3), 287-302.
- 667 11. Cheng, Y.X., Luo, L.Z., Jiang, X.F. & Sappington, T.W. (2012) Synchronized  
668 oviposition triggered by migratory flight intensifies larval outbreaks of beet  
669 webworm. *PLoS ONE*, 7, 1–7.
- 670 12. Cornara, D., Marra, M., Morente, M., Garzo E., Moreno A., Saponari, M.,  
671 Fereres, A. (2020a) Feeding behavior in relation to spittlebug transmission of  
672 *Xylella fastidiosa*. *Journal of Pest Science* (accepted).
- 673 13. Cornara D., Marra M., Tedone B., Cavalieri V., Porcelli F., Fereres A., Purcell  
674 S., Saponari M. (2020b). No evidence for cicadas implication in *Xylella*  
675 *fastidiosa* epidemiology. *Entomologia Generalis* (accepted).
- 676 14. Cornara, D., Morente, M., Markheiser, A., Bodino, N., Tsai, C. W., Fereres, A.,  
677 Richard A., Thomas M., & Lopes, J. R. S. (2019). An overview on the  
678 worldwide vectors of *Xylella fastidiosa*. *Entomologia Generalis*, 157-181.
- 679 15. Cornara, D., Bosco, D., & Fereres, A. (2018). *Philaenus spumarius*: when an  
680 old acquaintance becomes a new threat to European agriculture. *Journal of pest*  
681 *science*, 91(3), 957-972.
- 682 16. Cornara, D., Saponari, M., Zeilinger, A. R., de Stradis, A., Boscia, D.,  
683 Loconsole, G., Bosco, D., Marteli, G.P., Almedia, R.P.P., & Porcelli, F.  
684 (2017a). Spittlebugs as vectors of *Xylella fastidiosa* in olive orchards in  
685 Italy. *Journal of pest science*, 90(2), 521-530.
- 686 17. Cornara, D., Cavalieri, V., Dongiovanni, C., Altamura, G., Palmisano, F.,  
687 Bosco, D., Porcelli F., Almeida R.P.P., & Saponari, M. (2017b). Transmission  
688 of *Xylella fastidiosa* by naturally infected *Philaenus spumarius* (Hemiptera,



- 689 Aphrophoridae) to different host plants. *Journal of Applied Entomology*, 141(1-  
690 2), 80-87.
- 691 18. Cornara, D., Sicard, A., Zeilinger, A. R., Porcelli, F., Purcell, A. H., &  
692 Almeida, R. P. P. (2016). Transmission of *Xylella fastidiosa* to grapevine by the  
693 meadow spittlebug. *Phytopathology*, 106(11), 1285-1290.
- 694 19. Coviella, C. E., Garcia, J. F., Jeske, D. R., Redak, R. A., & Luck, R. F. (2006).  
695 Feasibility of tracking within-field movements of *Homalodisca coagulata*  
696 (Hemiptera: Cicadellidae) and estimating its densities using fluorescent dusts in  
697 mark–release–recapture experiments. *Journal of economic entomology*, 99(4),  
698 1051-1057.
- 699 20. Crist, T. O., Guertin, D. S., Wiens, J. A., & Milne, B. T. (1992). Animal  
700 movement in heterogeneous landscapes: an experiment with *Eleodes* beetles in  
701 shortgrass prairie. *Functional Ecology*, 536-544.
- 702 21. Cruaud, A., Gonzalez, A. A., Godefroid, M., Nidelet, S., Streito, J. C., Thuillier,  
703 J. M., Rossi J. P., Sabtibu S., & Rasplus, J. Y. (2018). Using insects to detect,  
704 monitor and predict the distribution of *Xylella fastidiosa* a case study in  
705 Corsica. *Scientific reports*, 8(1), 15628.
- 706 22. Della Giustina, W., Bonfils, J., & Le Quesne, W. J. (1989). *Homoptères*  
707 *cicadellidae: compléments aux ouvrages d'Henri Ribaut* (Vol. 3). Institut  
708 national de la recherche agronomique.
- 709 23. Dingle, H. (1966). Some factors affecting flight activity in individual milkweed  
710 bugs (*Oncopeltus*). *Journal of Experimental Biology*, 44, 335–343.
- 711 24. Dongiovanni, C., Cavalieri, V., Bodino, N., Tauro, D., Di Carolo, M.,  
712 Fumarola, G., Altamura G., Lasorella C., & Bosco, D. (2018). Plant selection  
713 and population trend of spittlebug immatures (Hemiptera: Aphrophoridae) in

- 714 olive groves of the Apulia Region of Italy. *Journal of economic*  
715 *entomology*, 112(1), 67-74.
- 716 25. Drake, V. A. (1985). Radar observations of moths migrating in a nocturnal low  
717 level jet. *Ecological Entomology*, 10(3), 259-265.
- 718 26. Drake, V. A., & Farrow, R. A. (1988). The influence of atmospheric structure  
719 and motions on insect migration. *Annual review of entomology*, 33(1), 183-210.
- 720 27. EFSA. (2019). *Xylella fastidiosa*. Available online:  
721 <https://www.efsa.europa.eu/en/topics/topic/xylella-fastidiosa>
- 722 28. Elbeaino, T., Yaseen, T., Valentini, F., Ben Moussa, I. E., Mazzoni, V., &  
723 D'onghia, A. M. (2014). Identification of three potential insect vectors of  
724 *Xylella fastidiosa* in southern Italy. *Phytopathologia Mediterranea*, 328-332.
- 725 29. EPPO. (2018). *Xylella fastidiosa* in the EPPO region. Available online:  
726 [https://www.eppo.int/ACTIVITIES/plant\\_quarantine/shortnotes\\_qps/shortnotes](https://www.eppo.int/ACTIVITIES/plant_quarantine/shortnotes_qps/shortnotes_xylella)  
727 [\\_xylella](https://www.eppo.int/ACTIVITIES/plant_quarantine/shortnotes_qps/shortnotes_xylella)
- 728 30. EPPO. (2019). First report of *Xylella fastidiosa* in Israel. Available online:  
729 <https://gd.eppo.int/reporting/article-6551>
- 730 31. EU 2015/789, Article 6. Official Journal of the European Commission. As  
731 regards measures to prevent the introduction into and the spread within the  
732 Union of *Xylella fastidiosa* (Wells et al.). 18 of May 2015.
- 733 32. European Commission (2019). List of demarcated areas established in the  
734 Union territory for the presence of *Xylella fastidiosa* as referred to in Article  
735 4(1) of Decision (EU) 2015/789. Available online:  
736 [https://ec.europa.eu/food/sites/food/files/plant/docs/ph\\_biosec\\_legis\\_list-](https://ec.europa.eu/food/sites/food/files/plant/docs/ph_biosec_legis_list-demarcated-union-territory_en.pdf)  
737 [demarcated-union-territory\\_en.pdf](https://ec.europa.eu/food/sites/food/files/plant/docs/ph_biosec_legis_list-demarcated-union-territory_en.pdf)

- 738 33. Feil, H., Feil, W. S., & Purcell, A. H. (2003). Effects of date of inoculation on  
739 the within-plant movement of *Xylella fastidiosa* and persistence of Pierce's  
740 disease within field grapevines. *Phytopathology*, 93(2), 244-251.
- 741 34. Fereres A., Irwin, M. E., & Kampmeier, G. E. (2017). Aphid movement:  
742 Process and consequences. *Aphids as Crop Pests*, 2nd ed.; van Emden, HF,  
743 Harrington, R., Eds, 196-224.
- 744 35. Frazier, N. W. (1965). Xylem viruses and their insect vectors, pp. 91-99. In W.  
745 B. Hewitt [ed.], Proceedings International Conference on Virus and Vector on  
746 Perennial Hosts, with Special Reference to Vitis, 6-10 September 1965, Davies,  
747 CA. University of California Press, Davis.
- 748 36. Freeman, J. A. (1945). Studies in the distribution of insects by aerial currents.  
749 *The Journal of Animal Ecology*, 128-154.
- 750 37. Generalitat Valenciana. (2019). Situación de *Xylella fastidiosa* en la Comunitat  
751 Valenciana. Available online:  
752 [http://www.agroambient.gva.es/documents/163214705/163847802/20190926+S](http://www.agroambient.gva.es/documents/163214705/163847802/20190926+Situacion+de+Xf+en+la+C+Valenciana+web.pdf/2018880e-5762-4ed9-829c-b660fd8970d3)  
753 [ituacion+de+Xf+en+la+C+Valenciana+web.pdf/2018880e-5762-4ed9-829c-](http://www.agroambient.gva.es/documents/163214705/163847802/20190926+Situacion+de+Xf+en+la+C+Valenciana+web.pdf/2018880e-5762-4ed9-829c-b660fd8970d3)  
754 [b660fd8970d3](http://www.agroambient.gva.es/documents/163214705/163847802/20190926+Situacion+de+Xf+en+la+C+Valenciana+web.pdf/2018880e-5762-4ed9-829c-b660fd8970d3)
- 755 38. Gerhardt, J. R. (1962). An example of a nocturnal low-level jet stream. *Journal*  
756 *of the Atmospheric Sciences*, 19(1), 116-118.
- 757 39. Guo, J. L., Li, X. K., Shen, X. J., Wang, M. L., & Wu, K. M. (2020). Flight  
758 Performance of *Mamestra brassicae* (Lepidoptera: Noctuidae) Under Different  
759 Biotic and Abiotic Conditions. *Journal of Insect Science*, 20(1), 2.
- 760 40. Hagler, J. R. (2019). Super mark it! A review of the protein immunomarking  
761 technique. *Annals of the Entomological Society of America*, 112(3), 200-210.

- 762 41. Hagler, J. R., & Jackson, C. G. (2001). Methods for marking insects: current  
763 techniques and future prospects. *Annual review of entomology*, 46(1), 511-543.
- 764 42. Halkka, O., Raatikainen, M., Halkka, L., & Lokki, J. (1971). Factors  
765 determining the size and composition of island populations of *Philaenus*  
766 *spumarius* (L.)(Homoptera). *Acta entomologica fennica*, 28, 83-100.
- 767 43. Halkka, O., Raatikainen, M., Vasarainen, A., & Heinonen, L. (1967). Ecology  
768 and ecological genetics of *Philaenus spumarius* (L.)(Homoptera). In *Annales*  
769 *Zoologici Fennici* (Vol. 4). Helsinki.
- 770 44. Haynes, K. J., & Cronin, J. T. (2003). Matrix composition affects the spatial  
771 ecology of a prairie planthopper. *Ecology*, 84(11), 2856-2866.
- 772 45. Haynes, K.J., & Cronin, J.T. (2006). Interpatch movement and edge effects: the  
773 role of behavioral responses to the landscape matrix. *Oikos*, 113, 43-54.
- 774 46. Hopkins, D. L. (1989). Xylella fastidiosa: xylem-limited bacterial pathogen of  
775 plants. *Annual review of phytopathology*, 27(1), 271-290.
- 776 47. Holzinger, W.; Kammerlander, I.; Nickel, H. (2003). The Auchenorrhyncha of  
777 Central Europe Die Zikaden Mitteleuropas Vol. 1 Fulgoromorpha, Cicadomorpha  
778 Excl; Cicadellidae; Brill Leiden: Boston, MA, USA, pp. 1– 673.
- 779
- 780 48. Hunter, M. D. (2002). Landscape structure, habitat fragmentation, and the  
781 ecology of insects. *Agricultural and Forest Entomology*, 4(3), 159-166.
- 782 49. IBM Corp. Released 2017. IBM SPSS Statistics for Windows, Version 25.0.  
783 Armonk, NY: IBM Corp.
- 784 50. Irwin, M. E., & Thresh, J. M. (1988). Long-range aerial dispersal of cereal  
785 aphids as virus vectors in North America. *Philosophical Transactions of the*  
786 *Royal Society of London. B, Biological Sciences*, 321(1207), 421-446.

- 787 51. Isard, S. A., Irwin, M. E., & Hollinger, S. E. (1990). Vertical distribution of  
788 aphids (Homoptera: Aphididae) in the planetary boundary layer. *Environmental*  
789 *Entomology*, 19(5), 1473-1484.
- 790 52. Jacques, M. A., Coletta-Filho, H. D., Burbank, L., Clover, G., Elansky, S.,  
791 Marques, A. A., Fujikawa T., Ganci P. E., Karahan A., Krugner R., Loreti S.,  
792 Alessandra A., Sutton-Croft M., Takai Y. & Wei1, G. (2019). G20 MACS  
793 Transboundary and emerging pests: *Xylella fastidiosa*.
- 794 53. Jones, C.M., Papanicolaou, A., Mironidis, G.K., Vontas, J., Yang, Y., Lim, K.S.  
795 Oakeshott J.G., Bass C. & Chapman J.W. (2015) Genomewide transcriptional  
796 signatures of migratory flight activity in a globally invasive insect pest.  
797 *Molecular Ecology*, 24, 4901–4911.
- 798 54. Jonsen, I. D., & Taylor, P. D. (2000). Fine scale movement behaviors of  
799 calopterygid damselflies are influenced by landscape structure: an experimental  
800 manipulation. *Oikos*, 88(3), 553-562.
- 801 55. Krogh, A., & Weis-Fogh, T. (1952). A roundabout for studying sustained flight  
802 of locusts. *Journal of Experimental Biology*, 29(2), 211-219.
- 803 56. Krugner, R., Sisterson, M. S., Backus, E. A., Burbank, L. P., & Redak, R. A.  
804 (2019). Sharpshooters: a review of what moves *Xylella fastidiosa*. *Austral*  
805 *Entomology*, 58(2), 248-267.
- 806 57. Lavigne, R. (1959). Biology of *Philaenus leucophthalmus* (L.), in  
807 Massachusetts. *Journal of Economic Entomology*, 52(5), 904-907.
- 808 58. Lessio, F., Tota, F., Alma, A. (2014). Tracking the dispersion of *Scaphoideus*  
809 *titanus* Ball (Hemiptera: Cicadellidae) from wild to cultivated grapevine: use of  
810 a novel mark–capture technique. *Bulletin of entomological research*, 104(4),  
811 432-443.

- 812 59. Loconsole, G., Castellano, C., Fattorini, S., Ponti, L., Gutierrez, A. P., & Beck,  
813 P. S. (2020). Small world in the real world: long distance dispersal governs  
814 epidemic dynamics in agricultural landscapes. *Epidemics*, 100384.
- 815 60. Loconsole, G., Potere, O., Boscia, D., Altamura, G., Djelouah, K., Elbeaino, T.,  
816 Frasher D., Lorusso D., Palmisano F., Pollastro P., Silletti M.R., Trisciuzzi  
817 N., Valentini F., Savino V., Saponari M. (2014). Detection of *Xylella fastidiosa*  
818 in olive trees by molecular and serological methods. *Journal of Plant*  
819 *Pathology*, 96(1), 7-14.
- 820 61. Lopes, J. R., Landa, B. B., & Fereres, A. (2014). A survey of potential insect  
821 vectors of the plant pathogenic bacterium *Xylella fastidiosa* in three regions of  
822 Spain. *Spanish Journal of Agricultural Research*, 12(3), 795-800.
- 823 62. MAPA. GOB (2019). *Xylella fastidiosa*. Agricultura, Sanidad vegetal. Aviable  
824 online: [https://www.mapa.gob.es/es/agricultura/temas/sanidad-vegetal/xylella-](https://www.mapa.gob.es/es/agricultura/temas/sanidad-vegetal/xylella-fastidiosa/)  
825 [fastidiosa/](https://www.mapa.gob.es/es/agricultura/temas/sanidad-vegetal/xylella-fastidiosa/)
- 826 63. Martelli, G. P., Boscia, D., Porcelli, F., & Saponari, M. (2016). The olive quick  
827 decline syndrome in south-east Italy: a threatening phytosanitary emergency.  
828 *European Journal of Plant Pathology*, 144(2), 235-243.
- 829 64. Martini, X., Hoffmann, M., Coy, M. R., Stelinski, L. L., & Pelz-Stelinski, K. S.  
830 (2015). Infection of an insect vector with a bacterial plant pathogen increases its  
831 propensity for dispersal. *PLoS One*, 10(6), e0129373.
- 832 65. Mazzoni, V. (2005). Contribution to the knowledge of the Auchenorrhyncha  
833 (Hemiptera Fulgoromorpha and Cicadomorpha) of Tuscany (Italy). *Redia*, 88,  
834 85-102.
- 835 66. Minter, M., Pearson, A., Lim, K. S., Wilson, K., Chapman, J. W., & Jones, C.  
836 M. (2018). The tethered flight technique as a tool for studying life-history

- 837 strategies associated with migration in insects. *Ecological entomology*, 43(4),  
838 397-411.
- 839 67. Miranda, M. P., Zanardi, O. Z., Tomaseto, A. F., Volpe, H. X., Garcia, R. B., &  
840 Prado, E. (2018). Processed kaolin affects the probing and settling behavior of  
841 *Diaphorina citri* (Hemiptera: Lividae). *Pest Management Science*, 74(8), 1964-  
842 1972.
- 843 68. Moralejo, E., Borràs, D., Gomila, M., Montesinos, M., Adrover, F., Juan, A.,  
844 Nieto A., Olmo D., Seguí G., & Landa, B. B. (2019). Insights into the  
845 epidemiology of Pierce's disease in vineyards of Mallorca, Spain. *Plant*  
846 *Pathology*, 68(8), 1458-1471.
- 847 69. Morente, M., Cornara, D., Plaza, M., Durán, J., Capiscol, C., Trillo, R., Ruiz  
848 M., Ruz C., Sanjuan S., Pereira J.A., Moreno, A., & Fereres A. (2018a).  
849 Distribution and relative abundance of insect vectors of *Xylella fastidiosa* in  
850 olive groves of the Iberian Peninsula. *Insects*, 9(4), 175.
- 851 70. Morente, M., Cornara, D., Sanjuan, S., Plaza, M., Moreno, A., Fereres, A.  
852 (2018b). Vectores de *Xylella fastidiosa* en la comarca de Guadalest (Alicante).  
853 *Agrícola Vergel*, 411, 228-230
- 854 71. Mozaffarian, F., & Wilson, M. R. (2016). A checklist of the leafhoppers of Iran  
855 (Hemiptera: Auchenorrhyncha: Cicadellidae). *Zootaxa*, 4062(1), 1-63.
- 856 72. Nakata, T. (2008). Effectiveness of micronized fluorescent powder for marking  
857 citrus psyllid, *Diaphorina citri*. *Applied entomology and zoology*, 43(1), 33-36.
- 858 73. Nilakhe, S. S., & Buainain, C. M. (1988). Observations on movement of  
859 spittlebug adults. *Embrapa Gado de Corte-Artigo em periódico indexado*  
860 (*ALICE*), 23 (2), 123-134.

- 861 74. Northfield, T. D., Mizell III, R. F., Paini, D. R., Andersen, P. C., Brodbeck, B.  
862 V., Riddle, T. C., & Hunter, W. B. (2009). Dispersal, patch leaving, and  
863 distribution of *Homalodisca vitripennis* (Hemiptera:  
864 Cicadellidae). *Environmental entomology*, 38(1), 183-191.
- 865 75. Novotny, V., & Wilson, M. R. (1997). Why are there no small species among  
866 xylem-sucking insects? *Evolutionary Ecology*, 11(4), 419-437.
- 867 76. Ossiannilsson, F. (1981). The Auchenorrhyncha (Homoptera) of Fennoscandia  
868 and Denmark. Part 2: The families Cicadidae, Cercopidae, Membracidae, and  
869 Cicadellidae (excl. Deltocephalinae). *The Auchenorrhyncha (Homoptera) of*  
870 *Fennoscandia and Denmark. Part 2: the families Cicadidae, Cercopidae,*  
871 *Membracidae, and Cicadellidae (excl. Deltocephalinae).*, 7(2), 223-593.
- 872 77. Pienkowski, R. L., & Medler, J. T. (1964). Synoptic weather conditions  
873 associated with long-range movement of the potato leafhopper, *Empoasca*  
874 *fabae*, into Wisconsin. *Annals of the Entomological Society of America*, 57(5),  
875 588-591.
- 876 78. Plazio, E., Bodino, N., Cavalieri, V., Dongiovanni, E., Fumarola, G., Ciniero,  
877 A., Galetto, L., Saponari, M., Bosco, D. (2017). Investigations on dispersal  
878 capability of *Philaenus spumarius* by mark release-recapture method.  
879 *Proceedings of the European Conference on Xylella – Finding answers to a*  
880 *global problem*, Palma de Mallorca, 13–15 November 2017, 56 pp.
- 881 79. Prasifka, J. R., Krauter, P. C., Heinz, K. M., Sansone, C. G., & Minzenmayer,  
882 R. R. (1999). Predator conservation in cotton: using grain sorghum as a source  
883 for insect predators. *Biological Control*, 16(2), 223-229.
- 884 80. Purcell, A. H. (1980). Almond leaf scorch: leafhopper and spittlebug vectors.  
885 *Journal of Economic Entomology*, 73(6), 834-838.



- 886 81. Purcell, A. H., Gravena, S., & Donadio, L. C. (1994). Sharpshooter in citrus  
887 crops. Citrus-integrated management of insect and mite pests. *Bebedouro,*  
888 *Estação Experimental de Citricultura*, 213-229.
- 889 82. Redak, R. A., Purcell, A. H., Lopes, J. R., Blua, M. J., Mizell Iii, R. F., &  
890 Andersen, P. C. (2004). The biology of xylem fluid-feeding insect vectors of  
891 *Xylella fastidiosa* and their relation to disease epidemiology. *Annual Reviews in*  
892 *Entomology*, 49(1), 243-270.
- 893 83. Reynolds, D. R., Chapman, J. W., & Stewart, A. J. (2017). Windborne  
894 migration of Auchenorrhyncha (Hemiptera) over Britain. *European Journal of*  
895 *Entomology*, 114: 554-564.
- 896 84. Riley, J. R., Downham, M. C. A., & Cooter, R. J. (1997). Comparison of the  
897 performance of Cicadulina leafhoppers on flight mills with that to be expected  
898 in free flight. *Entomologia Experimentalis et Applicata*, 83(3), 317-322.
- 899 85. Saponari, M., Boscia, D., Altamura, G., Loconsole, G., Zicca, S., D'Attoma, G.,  
900 ... & Savino, V. N. (2017). Isolation and pathogenicity of *Xylella fastidiosa*  
901 associated to the olive quick decline syndrome in southern Italy. *Scientific*  
902 *reports*, 7(1), 1-13.
- 903 86. Saponari, M., Boscia, D., Nigro, F., & Martelli, G. P. (2013). Identification of  
904 DNA sequences related to *Xylella fastidiosa* in oleander, almond and olive trees  
905 exhibiting leaf scorch symptoms in Apulia (Southern Italy). *Journal of Plant*  
906 *Pathology*, 95(3).
- 907 87. Sedlacek, J. D., & Freytag, P. H. (1986). Aspects of the field biology of the  
908 blackfaced leafhopper (Homoptera: Cicadellidae) in corn and pastures in  
909 Kentucky. *Journal of economic entomology*, 79(3), 605-613.

- 910 88. Somerville, A. G., Gleave, K., Jones, C. M., & Reimer, L. J. (2019). The  
911 consequences of *Brugia malayi* infection on the flight and energy resources of  
912 *Aedes aegypti* mosquitoes. *Scientific Reports*, 9(1), 1-9.
- 913 89. Southwood, T. R. E. (1962). Migration of terrestrial arthropods in relation to  
914 habitat. *Biological reviews*, 37(2), 171-211.
- 915 90. Stern, V. M., Dietrick, E. J., & Mueller, A. (1965). Improvements on self-  
916 propelled equipment for collecting, separating, and tagging mass numbers of  
917 insects in the field. *Journal of Economic Entomology*, 58(5), 949-953.
- 918 91. Stewart, A. J. (2002). Techniques for sampling Auchenorrhyncha in grasslands.  
919 *Landesmuseums Neue Folge*, 176, 491-512.
- 920 92. Strona, G., Castellano, C., Fattorini, S., Ponti, L., Gutierrez, A. P., & Beck, P.  
921 S. (2020). Small world in the real world: long distance dispersal governs  
922 epidemic dynamics in agricultural landscapes. *Epidemics*, 30, 100384.
- 923 93. Taylor, L. R. (1974). Insect migration, flight periodicity and the boundary  
924 layer. *The Journal of Animal Ecology*, 225-238.
- 925 94. Taylor, R. A. J., Nault, L. R., Styer, W. E., & Cheng, Z. B. (1992). Computer-  
926 monitored, 16-channel flight mill for recording the flight of leafhoppers  
927 (Homoptera: Auchenorrhyncha). *Annals of the Entomological Society of*  
928 *America*, 85(5), 627-632.
- 929 95. Wallin, J. R., & Loonan, D. V. (1971). Low-level jet winds, aphid vectors, local  
930 weather, and barley yellow dwarf virus outbreaks. *Phytopathology*, 61(9), 1068.
- 931 96. Waloff, N. (1973). Dispersal by flight of leafhoppers (Auchenorrhyncha:  
932 Homoptera). *Journal of Applied Ecology*, 705-730.

- 933 97. Weaver, C. R. (1951). The Seasonal Behavior of Meadow Spittlebug and Its  
934 Relation to a Control Method. *Journal of Economic Entomology*, 44(3), 350-  
935 353.
- 936 98. Weaver, C. R., & King, D. R. (1954). Meadow spittlebug, *Philaenus*  
937 *leucophthalmus* (L.). *Ohio Agricultural Experiment Station Bulletin*, 741, 1-99.
- 938 99. Wilson, C. M., & Shade, R. E. (1967). Relative attractiveness of various  
939 luminescent colors to the cereal leaf beetle and the meadow spittlebug. *Journal*  
940 *of Economic Entomology*, 60(2), 578-580.
- 941 100. Yu, E. Y., Gassmann, A. J., & Sappington, T. W. (2019). Using Flight Mills to  
942 Measure Flight Propensity and Performance of Western Corn Rootworm,  
943 *Diabrotica virgifera virgifera* (LeConte). *JoVE*, 152, e59196.
- 944 101. Zhang, Y., Wang, L.M., Wu, K.M., Wyckhuys, K.A.G. & Heimpel, G.E. (2008)  
945 Flight performance of the soybean aphid, *Aphis glycine*, (Hemiptera:  
946 Aphididae) under different temperature and humidity regimens. *Environmental*  
947 *Entomology*, 37, 301–306.
- 948 102. Zhu, M., Radcliffe, E. B., Ragsdale, D. W., MacRae, I. V., & Seeley, M. W.  
949 (2006). Low-level jet streams associated with spring aphid migration and  
950 current season spread of potato viruses in the US northern Great  
951 Plains. *Agricultural and Forest Meteorology*, 138(1-4), 192-202.
- 952
- 953
- 954
- 955
- 956
- 957

958 **6. TABLES & FIGURES**

959

960 **TABLE 1.** Summary of ANOVA or Kruskal-Wallis Test (selected depending on  
 961 the data distribution) comparing dusted (pink, blue, yellow, orange; n=10 marked  
 962 insects for each colour) and undusted (n=10) *N. campestris* adults (n=50).

| Flight Variable              | Kruskal-Wallis Test |     |      |
|------------------------------|---------------------|-----|------|
|                              | H'                  | d.f | P    |
| Number of single flights     | 5.45                | 4   | 0.24 |
| Total distance travelled (m) | 1.88                | 4   | 0.76 |
| Total flight duration (s)    | 1.84                | 4   | 0.77 |

  

| Flight Variable     | ANOVA |     |       |
|---------------------|-------|-----|-------|
|                     | F'    | d.f | P     |
| Mean velocity (m/s) | 2.2   | 4   | 0.084 |

963

964 **TABLE 2.** Flight descriptors data. Results are showed as total values (mean  $\pm$  SE) and  
 965 maximum values in a single flight of *N. campestris* adults (n=50).

| Flight descriptors       | Total (mean $\pm$ SE) | Maximum                     |
|--------------------------|-----------------------|-----------------------------|
| Number of single flights | 2.1 $\pm$ 0.26        | 10                          |
| Distance travelled (m)   | 281.54 $\pm$ 40.53    | 1362.3                      |
| Flight duration (sec)    | 1012.92 $\pm$ 137.62  | 4933.14 ( $\approx$ 82 min) |
| Flight speed (m/s)       | 0.26 $\pm$ 0.01       | 0.42                        |

966

967

968 **TABLE 3.** Number of individuals of *Neophilaenus campestris* recaptured. The “Total Recaptured” column shows the total number of  
 969 individuals of *N. campestris* (dusted and undusted) captured in the recapture zones. The ratios are expressed in parts per unit. Description and  
 970 location of the release and recapture sites is shown in Figure. 1.

| Zone           | No. released | No. recaptured | No. marked per colour |          |          |           | No. marked / No. released per colour |          |              |              |
|----------------|--------------|----------------|-----------------------|----------|----------|-----------|--------------------------------------|----------|--------------|--------------|
|                |              |                | Pink                  | Blue     | Yellow   | Orange    | Pink                                 | Blue     | Yellow       | Orange       |
| Release pink   | 335          | 0              | 0                     | 0        | 0        | 0         | 0                                    | 0        | 0            | 0            |
| Release blue   | 350          | 0              | 0                     | 0        | 0        | 0         | 0                                    | 0        | 0            | 0            |
| Release yellow | 300          | 0              | 0                     | 0        | 0        | 0         | 0                                    | 0        | 0            | 0            |
| Release orange | 330          | 0              | 0                     | 0        | 0        | 0         | 0                                    | 0        | 0            | 0            |
| A              | -            | 0              | 0                     | 0        | 0        | 0         | 0                                    | 0        | 0            | 0            |
| B              | -            | 0              | 0                     | 0        | 0        | 0         | 0                                    | 0        | 0            | 0            |
| C              | -            | 0              | 0                     | 0        | 0        | 0         | 0                                    | 0        | 0            | 0            |
| D              | -            | 209            | 0                     | 0        | 0        | 8         | 0                                    | 0        | 0            | ≈0.02        |
| E              | -            | 0              | 0                     | 0        | 0        | 0         | 0                                    | 0        | 0            | 0            |
| F              | -            | 0              | 0                     | 0        | 0        | 0         | 0                                    | 0        | 0            | 0            |
| G              | -            | 107            | 0                     | 0        | 0        | 8         | 0                                    | 0        | 0            | ≈0.02        |
| H              | -            | 8              | 0                     | 0        | 0        | 0         | 0                                    | 0        | 0            | 0            |
| I              | -            | 73             | 0                     | 0        | 0        | 0         | 0                                    | 0        | 0            | 0            |
| J              | -            | 0              | 0                     | 0        | 0        | 0         | 0                                    | 0        | 0            | 0            |
| K              | -            | 402            | 0                     | 0        | 1        | 4         | 0                                    | 0        | 0.003        | ≈0.01        |
| L              | -            | 0              | 0                     | 0        | 0        | 0         | 0                                    | 0        | 0            | 0            |
| <b>Total</b>   | <b>1315</b>  | <b>791</b>     | <b>0</b>              | <b>0</b> | <b>1</b> | <b>20</b> | <b>0</b>                             | <b>0</b> | <b>0.003</b> | <b>≈0.05</b> |

971  
 972  
 973

974  
975

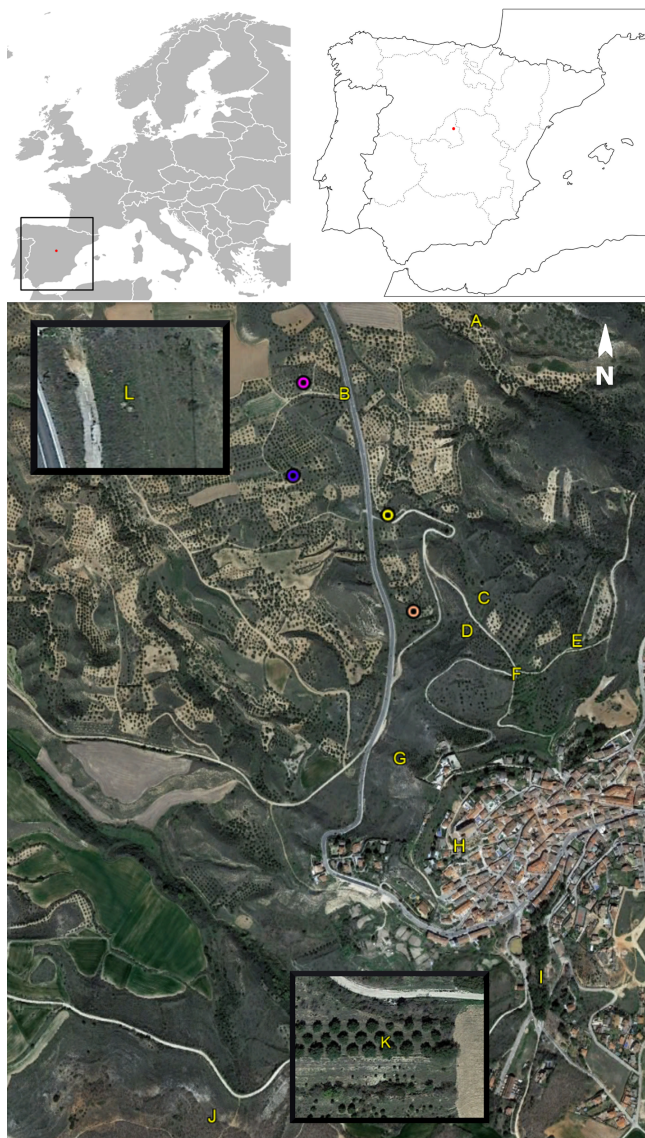

976  
977

978 **FIGURE 1.** Mark-release-recapture study zone. 1) Coloured circles: release points  
979 (pink, blue, yellow and orange) 2) Letters: recapture points. A: *Quercus coccifera*; B:  
980 *Foeniculum vulgare*, *Eryngium campestre* and Asteraceae; C: *Retama sphaerocarpa*  
981 and *E. campestre*; D: *Pinus halepensis*; E: *Prunus dulcis*; F: *P. dulcis*; G, H and I:  
982 *Pinus halepensis*; J: *Q. faginea* K: *P. halepensis* and *P. pinea*; L: *Foeniculum vulgare*  
983 and *Retama sphaerocarpa*. 3) Points L and K shown in the upper left and lower right  
984 corner, respectively are out of the map scale because they were located too far away  
985 from the release points.

986 Google. (n.d.). Los Santos de la Humosa. Retrieved from  
987 [https://www.google.es/maps/place/28817+Los+Santos+de+la+Humosa,+Madrid/@40.5](https://www.google.es/maps/place/28817+Los+Santos+de+la+Humosa,+Madrid/@40.5020998,-)  
988 [020998,-](https://www.google.es/maps/place/28817+Los+Santos+de+la+Humosa,+Madrid/@40.5020998,-)  
989



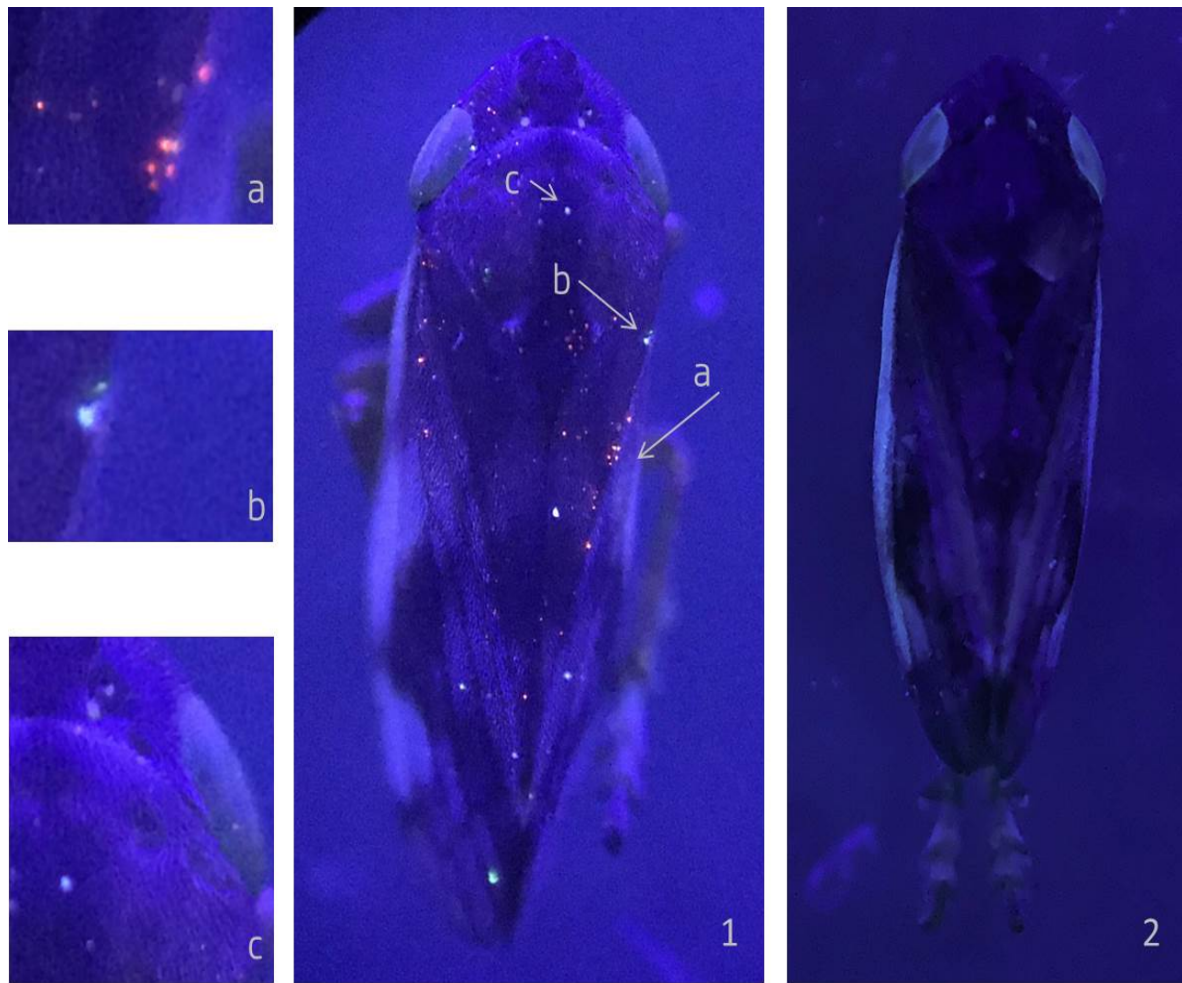

990  
991

992 **FIGURE 2.** (1) An orange marked *N. campestris* recaptured in the zone D and exposed  
993 to UV light. Orange fluorescent particles were clearly visible (a). Other particles were  
994 found that could be either yellow fluorescent particles (b) or dust (c) covering some  
995 parts of the insect's body. (2) An undusted individual of *N. campestris* exposed to UV  
996 light.

997  
998  
999  
1000  
1001  
1002  
1003  
1004  
1005  
1006  
1007  
1008  
1009  
1010

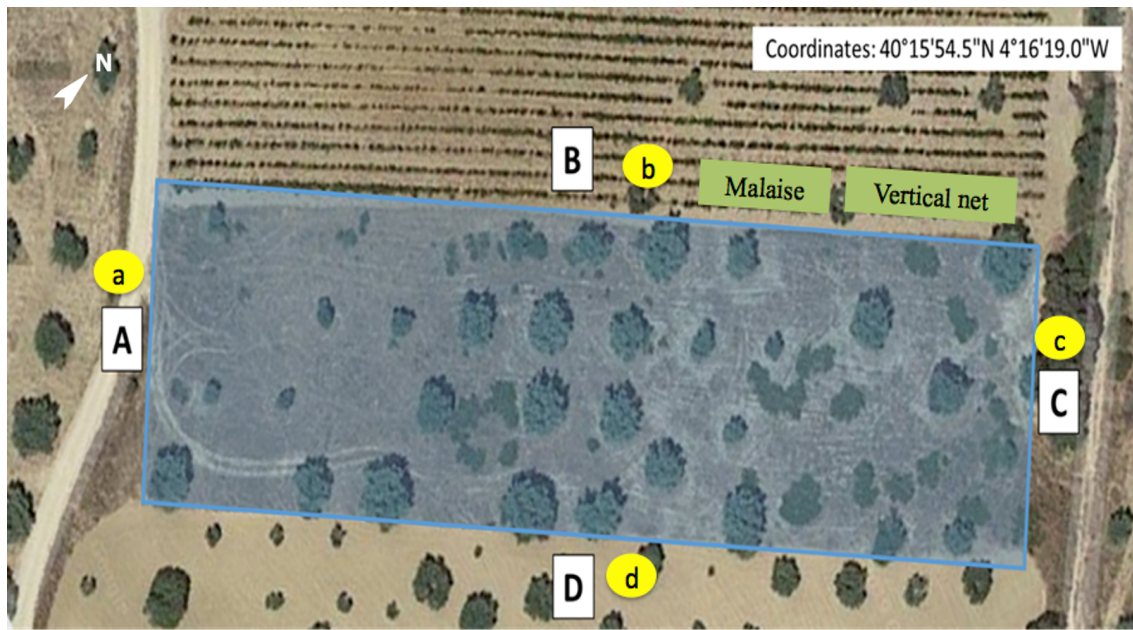

1011  
1012  
1013  
1014  
1015  
1016  
1017  
1018  
1019  
1020  
1021  
1022  
1023  
1024  
1025

**FIGURE 3.** Olive grove in Villa del Prado. Size: 6.075 m<sup>2</sup>. The olive grove has 4 borders (A, B, C, D), surrounded by: (A) olive grove, (B) vineyard, (C) olive grove and a few *Q. ilex* subsp. *ballota* trees, (D) olive grove. One yellow sticky band was placed on each border (bands: a, b, c, d). A directional Malaise trap and a vertical net were also placed on the border (B).

Google. (n.d.). Villa del Prado. Retrieved from: <https://www.google.es/maps/place/40%C2%B015'54.5%22N+4%C2%B016'19.0%22W/@40.2651569,-4.272151,132m/data=!3m1!1e3!4m5!3m4!1s0x0:0x0!8m2!3d40.2651389!4d-4.2719444?hl=es>

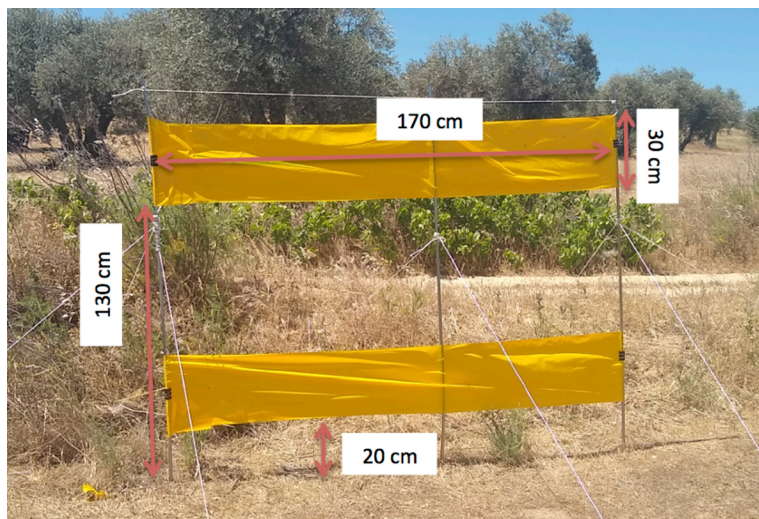

1026  
1027  
1028  
1029  
1030

**FIGURE 4.** One of the 4 vertical yellow sticky trap used in the survey of directional movement on potential vectors of *X. fastidiosa* in the olive grove placed in Villa del Prado, Madrid, Spain.



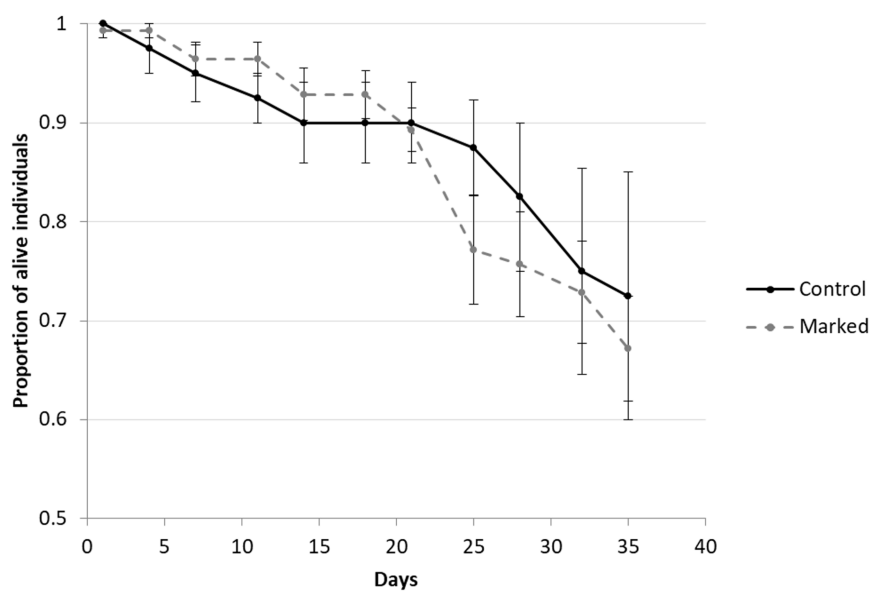

1031  
1032  
1033  
1034

**FIGURE 5.** Survivorship curves for insects marked with fluorescence dust (dashed line) and undusted control insects (continuous line). Standard error bars are shown.

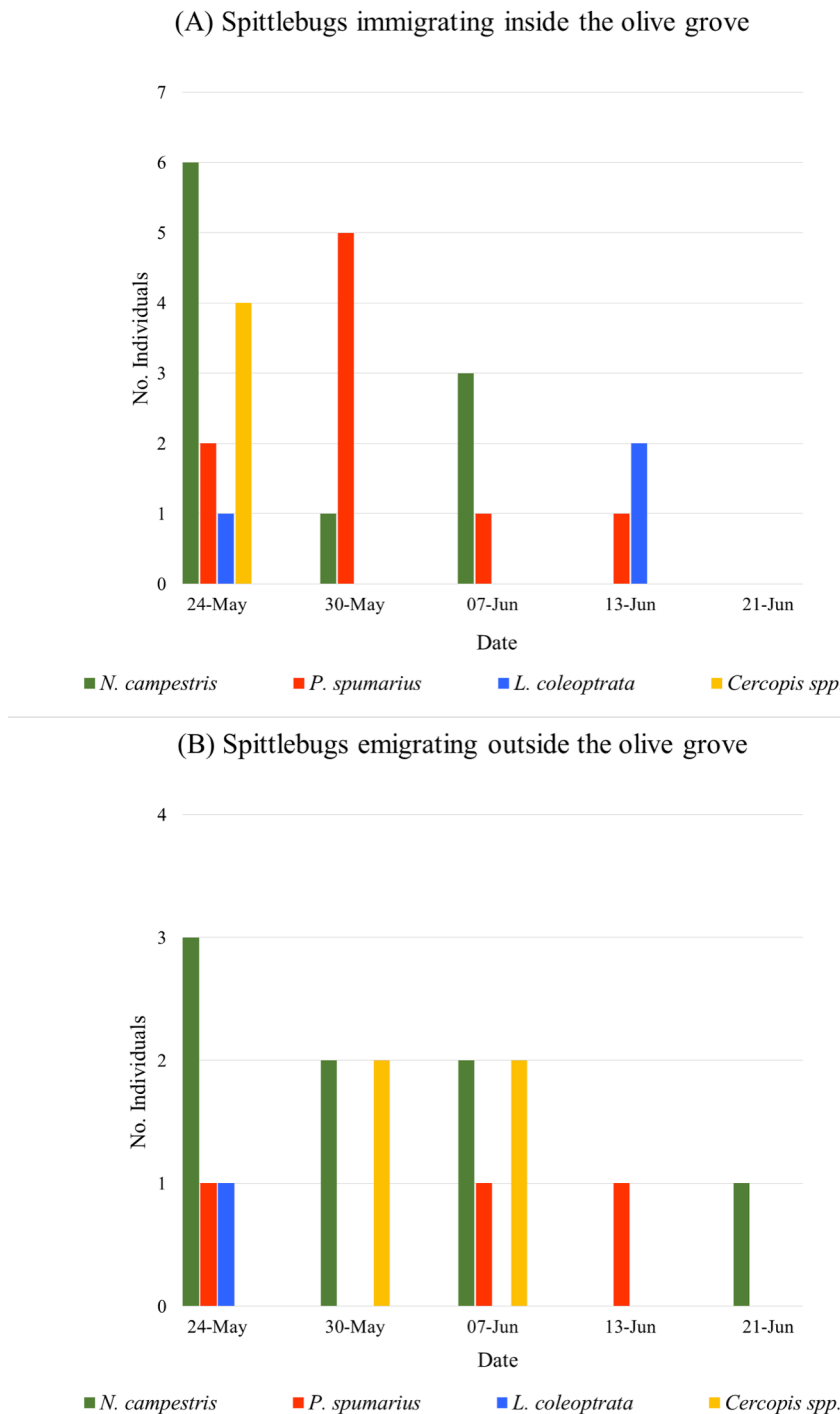

1035  
1036  
1037  
1038  
1039  
1040  
1041  
1042  
1043  
1044  
1045  
1046

**FIGURE 6.** Number of spittlebug adults caught on the yellow sticky trap between the vineyard and the olive grove (Figure 3. trap b). (A) Spittlebugs immigrating from the vineyard to the olive grove. (B) Spittlebugs emigrating from the olive grove to the vineyard.

**ANNEX 1.** Distance (m.) between the spittlebug release (colours) and the recapture (letters) points.
